# Supplementary material
Source: PubMed Central journal article supplement (PMC2493488)
Supplement: 00077.2008_1.pdf [file 00077.2008_1.pdf]

**Figure S1.** Correlations with the hippocampal formation comprise two distinct cortical systems. Correlated activity relative to seed regions in anterior lateral temporal (aITS; MNI coordinates [-50 -2 -32]) and inferior parietal lobule (IPL; [-44 -78 38]) are depicted for the two independent groups used to define the seeds (Data Set 1) and replicate the finding (Data Set 2). The maps are projected on the left cerebral hemisphere of the average fiducial PALS surface using Caret software (Van Essen 2005). The combined cortical networks generated by the hippocampal seeds correspond closely to the correlation map produced from a hippocampal formation seed reported in Vincent et al. (2006).
